# Supplementary material for: Apple Tree Leaves (Malus domestica Borkh) as a Valuable Source of Polyphenolic Compounds with a High Antioxidant Capacity
Source: MDPI journal article supplement (doi:10.3390/app14083252), 2024-04-12
Supplement: s1 [file s1]

Archive with 1 entries (1 files):
- applsci-2949297-supplementary.pdf
